# Supplementary material for: TLR2/4 deficiency prevents oxygen-induced vascular degeneration and promotes revascularization by downregulating IL-17 in the retina
Source: PubMed Central journal article supplement (PMC4906284; doi:10.1038/srep27739), 2016-06-14
Supplement: srep27739-s1.pdf [file srep27739-s1.pdf]

# **TLR2/4 deficiency prevents oxygen-induced vascular degeneration and promotes revascularization by downregulating IL-17 in the retina**

Chang He<sup>1#</sup>, Peilong Lai<sup>2#</sup>, Jing Wang<sup>1</sup>, Tian Zhou<sup>1</sup>, Zijing Huang<sup>1</sup>, Lingli Zhou<sup>1</sup>, Xialin Liu<sup>1\*</sup>

<sup>1</sup>State Key Laboratory of Ophthalmology, Zhongshan Ophthalmic Center, Sun Yat-Sen University, Guangzhou 510060, P. R. China;

<sup>2</sup>Department of Haematology, Guangdong General Hospital, Guangdong Academy of Medical Sciences, Guangzhou 510080, P. R. China;

# These authors contributed equally to this work.

\*Corresponding author: Xialin Liu (liuxl28@mail.sysu.edu.cn)

State Key Laboratory of Ophthalmology, Zhongshan Ophthalmic Center,

Sun Yat-Sen University, 54 South Xianlie Road, Guangzhou 510060

Guangdong, P. R. China, Tel & fax: 0086-20-87330294

Supplementary information

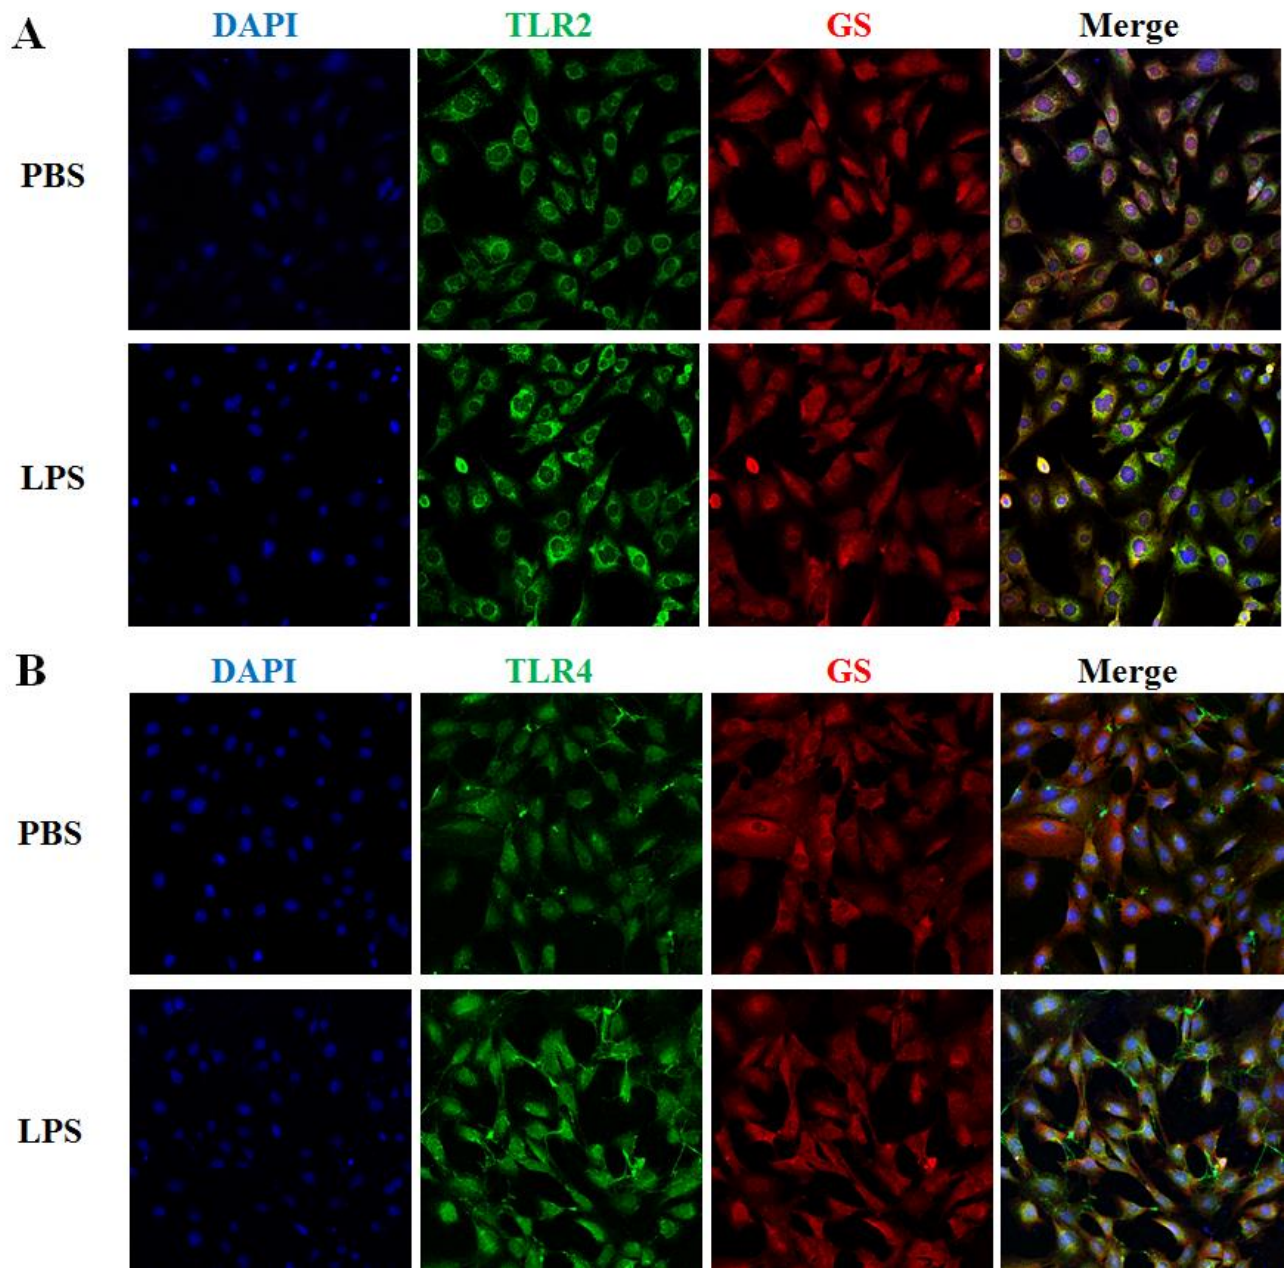

**Figure S1. TLR2 and TLR4 activation in response to LPS stimulation in retinal Müller cells.**

A dose of 100 ng/mL LPS could significantly activate the TLR2 (A) and TLR4 (B) on cultured retinal Müller cells.

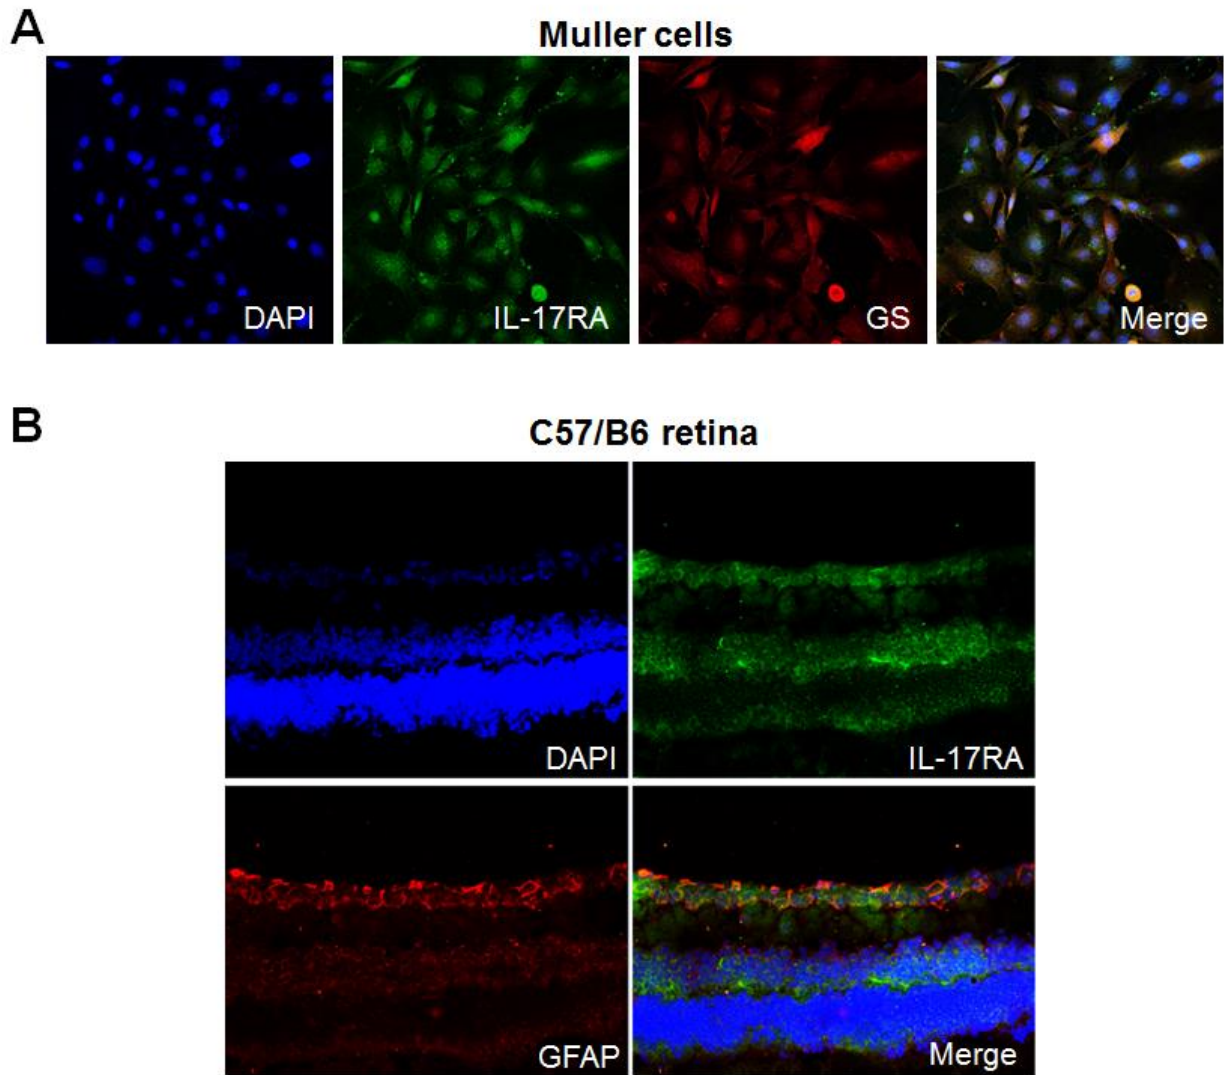

**Figure S2. Receptor for IL-17A is abundantly expressed on retinal glia cells.**

(A) The receptor for IL-17A (IL-17RA) is highly expressed in cultured Müller cells, which are identified by specific GS marker. (B) In C57/B6 mice, the IL-17RA is mainly distributed in GCL and INL in retina. Importantly, part of IL-17RA positive cells is co-staining with GFAP, glial cells activation marker in retina.

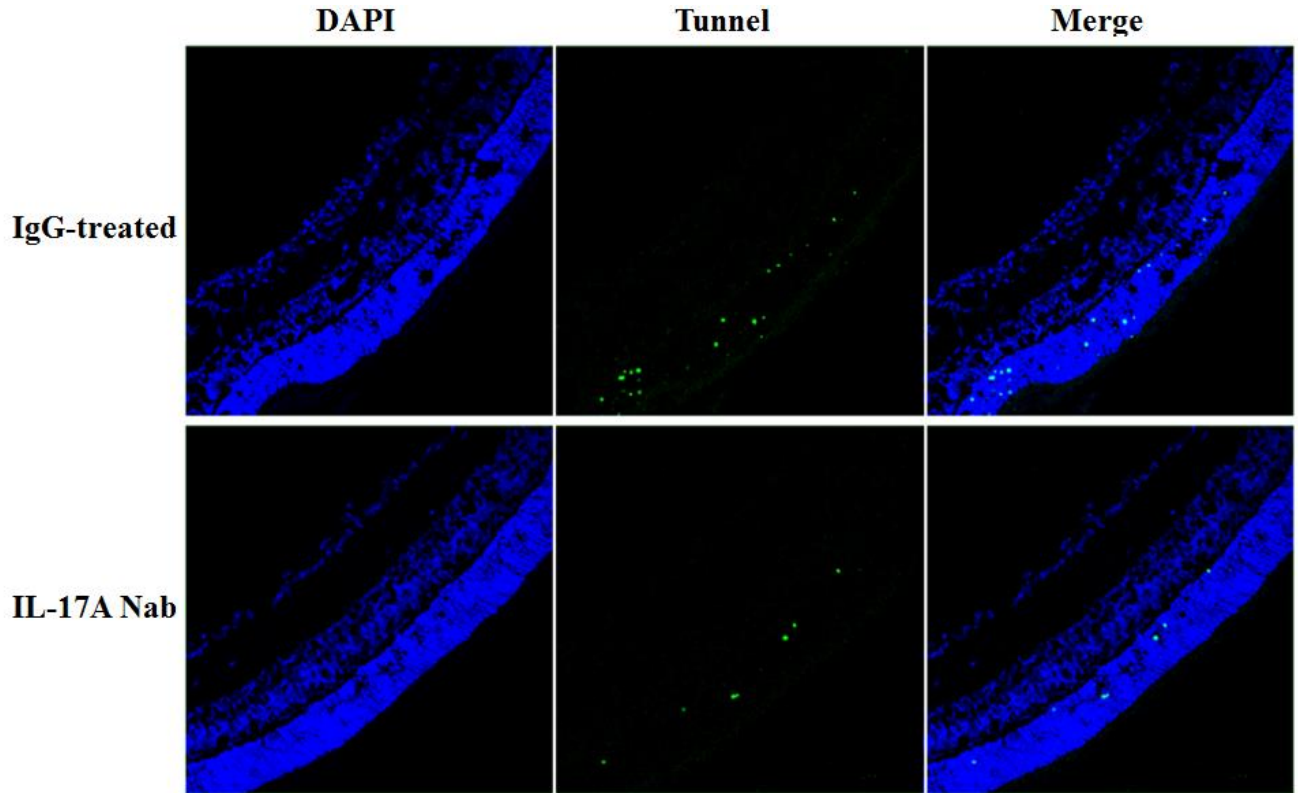

**Figure S3. Low magnification images of Tunnel staining after IL-17A blockade.**

The confocal images under (200X) were captured to show larger field of retinal sections. IL-17A blockade using neutralizing antibody suppressed retinal cellular apoptosis, presented as less Tunnel-positive cells in the OIR retina.

**Table S1. Primers used for real-time PCR**

| Gene name                     | Orientation | Primer sequence (5' to 3') | Species |
|-------------------------------|-------------|----------------------------|---------|
| <i>tgf-<math>\beta</math></i> | Forward     | TGCACCCAAACCGAAGTCAT       | Mouse   |
|                               | Reverse     | TTGTCAGAAGCCAGCGTTCAC      | Mouse   |
| <i>il-6</i>                   | Forward     | CAAAGCCAGAGTCCTTCAGA       | Mouse   |
|                               | Reverse     | GATGGTCTTGGTCCTTAGCC       | Mouse   |
| <i>rorrt</i>                  | Forward     | CCGCTGAGAGGGGCTTCAC        | Mouse   |
|                               | Reverse     | TGCAG-GAGTAGGCCACATTACA    | Mouse   |
| <i>il-10</i>                  | Forward     | CCCTTTGCTATGGTGTCTT        | Mouse   |
|                               | Reverse     | TGGTTTCTCTTCCCAAGACC       | Mouse   |
| <i>il-17</i>                  | Forward     | GGTCAACCTCAAAGTCTTTAACTC   | Mouse   |
|                               | Reverse     | TTAAAAATGCAAGTAAGTTTGCTG   | Mouse   |
| <i>foxp3</i>                  | Forward     | CCCAGGAAAGACAGCAACCTT      | Mouse   |
|                               | Reverse     | TTCTCACAACCAGGCCACTTG      | Mouse   |
| <i>gapdh</i>                  | Forward     | TGAGCAAGAGAGGCCCTATC       | Mouse   |
|                               | Reverse     | AGGCCCTCCTGTTATTATG        | Mouse   |
